# Supplementary material
Source: publisher figshare collection journal article supplement (https://rs.figshare.com/ndownloader/files/33981415)
Supplement: Supplementary file 1 [file 33981415]

Selected optimization of characters of the ‘rauisuchians’ including *Ticinosuchus ferox* and Paracrocodylomorpha in our first analysis (288 most parsimonious trees MPTs with a length of 1540 steps; Consistency Index = 0.332; Retention Index = 0.750).

*Ticinosuchus ferox* + *Alligator mississippiensis*

Unambiguous

30 0🡪1

195 0🡪1

210 0🡪1

291 0🡪1

294 0🡪1

298 0🡪1

400 0🡪2

ACCTRAN

6 2🡪1

45 1🡪0

132 0🡪1

141 0🡪1

191 1🡪0

202 0🡪1

270 0🡪1

292 1🡪0

293 0🡪1

314 0🡪1

414 0🡪1

432 0🡪1

DELTRAN

372 0🡪1

Paracrocodylomorpha

Unambiguous

283 0🡪1

358 0🡪1

395 0🡪1

ACCTRAN

149 0🡪1

301 1🡪0

339 0🡪1

DELTRAN

117 0🡪1

278 0🡪1

293 0🡪1

314 0🡪1

*Saurosuchus galilei* + *Alligator mississippiensis*

Unambiguous

265 0🡪1

419 0🡪1

ACCTRAN

2 0🡪1

27 0🡪1

29 0🡪1

42 0🡪1

51 0🡪1

52 0🡪1

133 0🡪1

142 0🡪1

147 0🡪1

239 0🡪1

258 0🡪2

278 0🡪1

340 0🡪1

341 1🡪0

397 0🡪1

428 0🡪1

431 0🡪1

DELTRAN

6 2🡪1

27 0🡪1

29 0🡪1

30 0🡪1

42 0🡪1

51 0🡪1

52 0🡪1

142 0🡪1

147 0🡪1

149 0🡪1

191 1🡪2

278 0🡪1

340 0🡪1

397 0🡪1

414 0🡪1

*Prestosuchus* *chiniquensis* ALL + *Alligator mississippiensis*

Unambiguous

12 0🡪1

108 0🡪1

131 0🡪1

289 0🡪1

DELTRAN

141 0🡪1

282 0🡪1

*Luperosuchus fractus* + *Alligator mississippiensis*

Unambiguous

37 0🡪1

429 0🡪1

ACCTRAN

59 0🡪1

111 0🡪1

156 0🡪1

221 0🡪1

319 0🡪1

339 1🡪0

349 0🡪1

354 0🡪1

364 0🡪1

390 0🡪1

399 0🡪1

400 2🡪0

404 0🡪1

407 0🡪1

410 1🡪0

411 0🡪1

420 0🡪1

423 0🡪1

426 0🡪1

*Batrachotomus kuperferzellensis* + *Alligator mississippiensis*

Unambiguous

29 1🡪0

34 0🡪1

43 0🡪1

49 0🡪1

89 0🡪1

144 0🡪1

ACCTRAN

40 0🡪1

65 0🡪1

106 0🡪1

149 1🡪0

429 1🡪0

DELTRAN

59 0🡪1

132 0🡪1

156 0🡪1

301 1🡪0

319 0🡪1

339 1🡪0

404 0🡪1

407 0🡪1

410 1🡪0

411 0🡪1

423 0🡪1

426 0🡪1

431 0🡪1

*Batrachotomus kuperferzellensis* + *Heptasuchus clarki*

Unambiguous

25 0🡪1

35 0🡪1

425 0🡪1

430 0🡪1

433 0🡪1

ACCTRAN

24 0🡪1

202 0🡪1

207 0🡪1

293 1🡪0

DELTRAN

65 0🡪1

219 0🡪1

*Fasolasuchus tenax* + *Alligator mississippiensis*

Unambiguous

281 0🡪1

312 0🡪1

314 1🡪0

344 0🡪1

375 0🡪1

376 2🡪1

414 1🡪0

ACCTRAN

14 0🡪1

15 0🡪1

22 0🡪1

45 0🡪1

51 1🡪0

66 0🡪1

71 0🡪1

72 0🡪1

78 0🡪1

90 0🡪1

91 0🡪1

103 0🡪1

105 0🡪1

121 0🡪1

122 1🡪2

129 0🡪1

130 0🡪1

191 2🡪1

219 1🡪0

224 0🡪1

227 0🡪1

232 0🡪1

269 0🡪1

DELTRAN

239 0🡪1

349 0🡪1

354 0🡪1

364 0🡪1

Rauisuchidae + *Alligator mississippiensis*

132🡪131

Unambiguous

154 0🡪2

197 1🡪0

240 0🡪1

341 0🡪1

DELTRAN

15 0🡪1

45 0🡪1

66 0🡪1

71 0🡪1

72 0🡪1

78 0🡪1

90 0🡪1

91 0🡪1

105 0🡪1

106 0🡪1

111 0🡪1

121 0🡪1

133 0🡪1

221 0🡪1

224 0🡪1

227 0🡪1

232 0🡪1

390 0🡪1

399 0🡪1

400 2🡪0
